# Supplementary material
Source: publisher site journal article supplement (https://www.kjim.org/upload/media/kjim-2021-546-suppl1.pdf)
Supplement: Supplementary file 1 [file kjim-2021-546-suppl1.pdf]

**Supplementary Table 1. Changes in pressure ulcer stage when leaving the ICU**

| Initial stage | Stage when leaving the ICU |           |           |         |             |               |           |
|---------------|----------------------------|-----------|-----------|---------|-------------|---------------|-----------|
|               | I                          | II        | III       | IV      | Unstageable | Suspected DTI | Healing   |
| I             |                            |           |           |         | 1 (50)      | 1 (50)        |           |
| II            |                            | 19 (35.8) | 5 (9.4)   |         | 1 (1.9)     |               | 13 (24.5) |
| III           |                            |           | 3 (50)    |         |             |               | 1 (16.7)  |
| Unstageable   |                            | 3 (15)    | 2 (10)    | 1 (5)   | 10 (50)     |               | 1 (5)     |
| Suspected DTI |                            | 3 (8.3)   | 3 (8.3)   | 1 (2.8) | 4 (11.1)    | 17 (47.2)     | 2 (5.6)   |
| Total         | 0                          | 25 (20.7) | 13 (10.7) | 2 (1.7) | 16 (13.2)   | 18 (14.9)     | 17 (14.0) |

Values are presented as number (%).

ICU, intensive care unit; DTI, deep-tissue injury.
